# Supplementary material for: Difluorobenzimidazole-decorated helical perylene diimide dimers for high-performance n-type organic field-effect transistors
Source: Royal Society of Chemistry journal article supplement (doi:10.1039/d2tc05095a), 2023-01-01
Supplement: d2tc05095a1.pdf [file d2tc05095a1.pdf]

## Supporting Information

### **Diffluorobenzimidazole Decorated Helical Perylene Diimide Dimer for High-Performance N-Type Organic Field-Effect Transistor**

Nuoya Li,<sup>a</sup> Li Chen,<sup>b</sup> Guangwei Shao,<sup>b</sup> Jingjing Zhao,<sup>b</sup> Di Wu,<sup>\*,a,b</sup> Jianlong Xia<sup>\*,a,b,c</sup>

<sup>a</sup> School of Chemistry, Chemical Engineering and Life Science, Wuhan University of Technology, No. 122 Luoshi Road, Wuhan 430070, China

<sup>b</sup> State Key Laboratory of Advanced Technology for Materials Synthesis and Processing, Center of Smart Materials and Devices, Wuhan University of Technology, No. 122 Luoshi Road, Wuhan 430070, China

<sup>c</sup> International School of Materials Science and Engineering, Wuhan University of Technology, No. 122 Luoshi Road, Wuhan, 430070, China

\*Corresponding Authors:

E-mail: D.W. (chemwd@whut.edu.cn); J.X. (jlxia@whut.edu.cn)

### **Table of the contents**

- 1. Material synthesis**
- 2. Thermogravimetric analysis (TGA)**
- 3. DFT calculation**
- 4. Optical and Electrochemical Properties.**
- 5. The organic field-effect transistors (OFETs) performance of the devices**
- 6. Microscopic morphology characterizations (AFM)**
- 7. <sup>1</sup>H and <sup>13</sup>C NMR spectra**
- 8. MALDI-TOF Mass spectrum**
- 9. Optimized geometry**

## 1. Material synthesis

**Synthetic procedures of FMBI-PDI2.** The condensation of compound **1** (300 mg, 0.224 mmol) with 4,5-difluorobenzene-1,2-diamine (162.6 mg, 1.12 mmol) in 30 mL propanoic acid at room temperature for 4 h. After adding water to the reaction mixture, precipitation was filtered. The crude products were purified by silica gel column chromatography (eluted with petroleum ether/CH<sub>2</sub>Cl<sub>2</sub> = 1:4) and lead to purple solid **FMBI-PDI2** (96 mg, 30%). <sup>1</sup>H NMR (500 MHz, CF<sub>3</sub>COOD) δ 11.09 (s, 1H.), 10.65 (d, *J* = 78.5 Hz, 3H), 10.16-9.27 (m, 8H), 9.05 (d, *J* = 22.0 Hz, 1H), 8.27-7.90 (m, 1H), 5.62 (d, *J* = 135.6 Hz, 3H), 2.54 (d, *J* = 136.2 Hz, 12H), 1.65 (d, *J* = 82.4 Hz, 48H), 1.08 (s, 16H). <sup>13</sup>C NMR (126 MHz, CF<sub>3</sub>COOD) δ 127.56, 124.24, 32.55, 31.73, 31.65, 29.17, 28.99, 26.98, 22.44, 22.31, 18.99, 12.82, 12.66. MS (MALDI-TOF): [M+H]<sup>+</sup> calculated for 1456.714; found 1456.830.

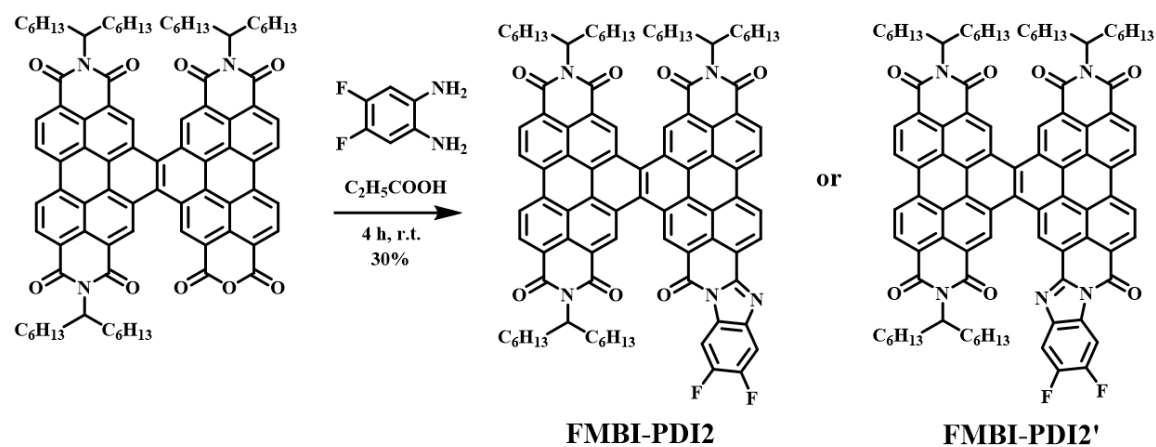

**Scheme S1** Synthetic route of **FMBI-PDI2**/**FMBI-PDI2'**

## 2. Thermogravimetric analysis (TGA)

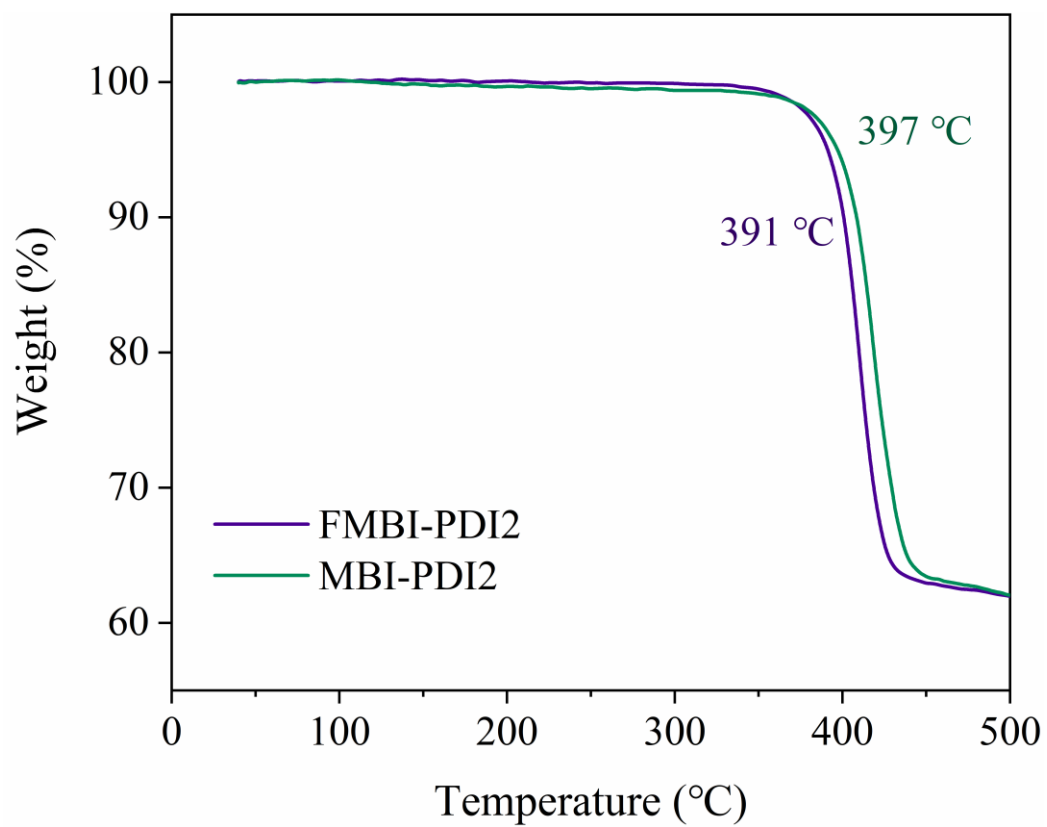

**Fig. S1.** TGA of **FMBI-PDI2** and **MBI-PDI2**

### 3. DFT calculation

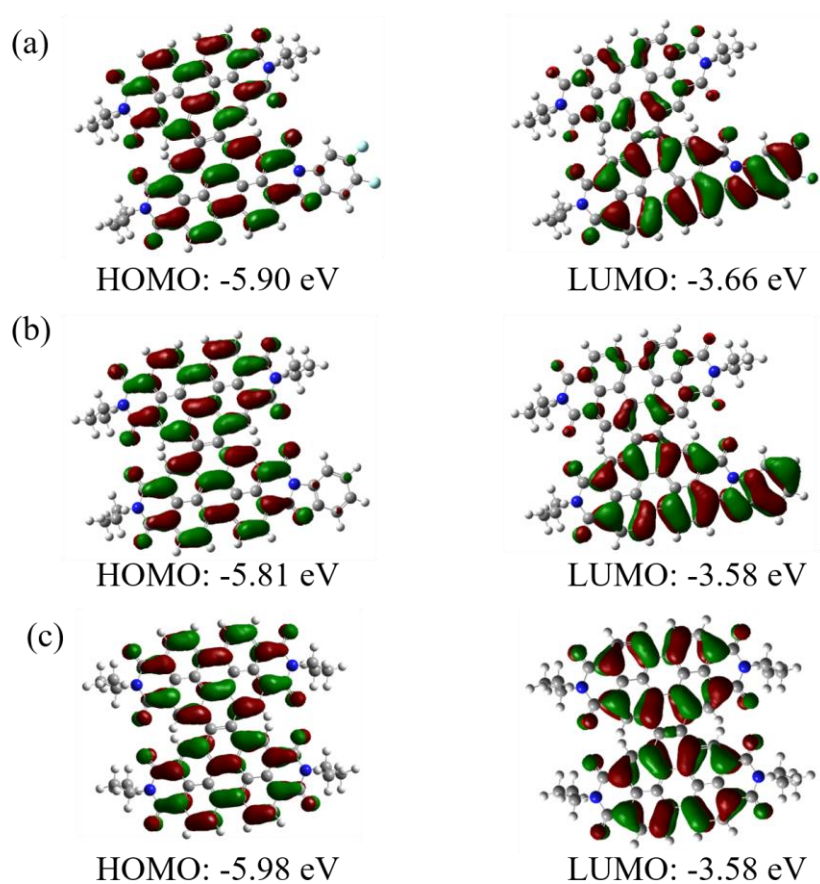

**Fig. S2.** Theoretical calculation of HOMO and LUMO electron density distributions of (a) **FMBI-PDI2**, (b) **MBI-PDI2** and (c) **PDI2**.

### 4. Optical and Electrochemical Properties.

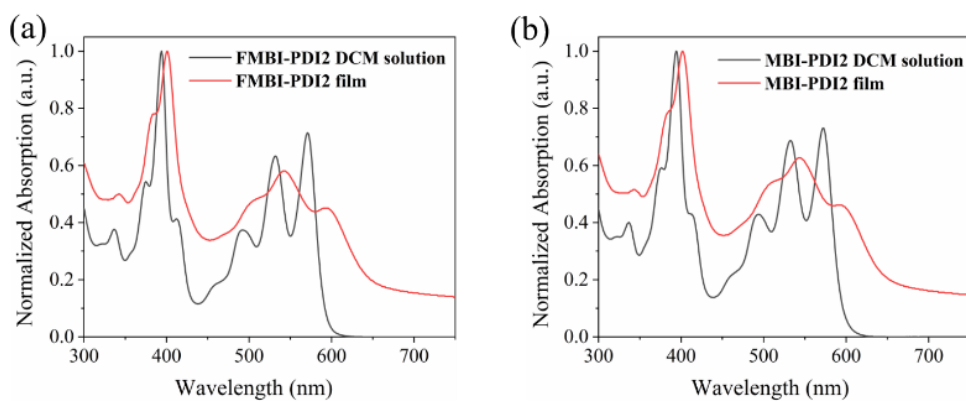

**Fig. S3.** The comparison profiles of absorption spectra in dichloromethane solution and films of (a) **FMBI-PDI2** and (b) **MBI-PDI2**.

## 5. The organic field-effect transistors (OFETs) performance of the devices

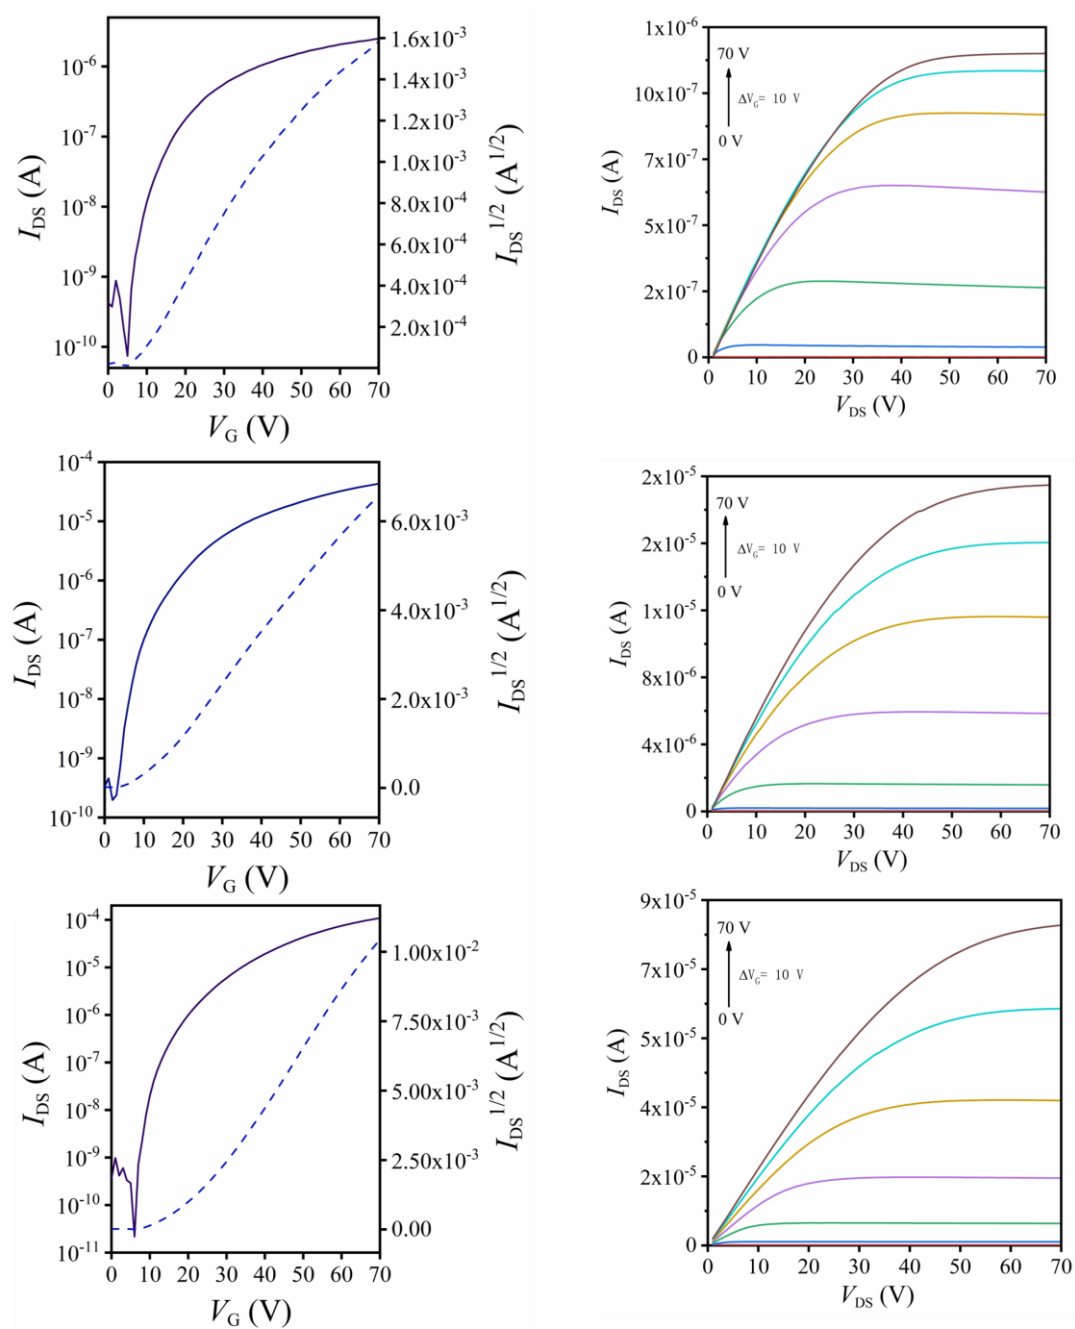

**Fig. S4.** Typical transfer and output characteristics of **FMBI-PDI2** based devices.

Transfer and output curves ( $V_{DS} = 70$  V) of **FMBI-PDI2** OFET devices annealed at room temperature, 180 °C, 260 °C for 10 min.

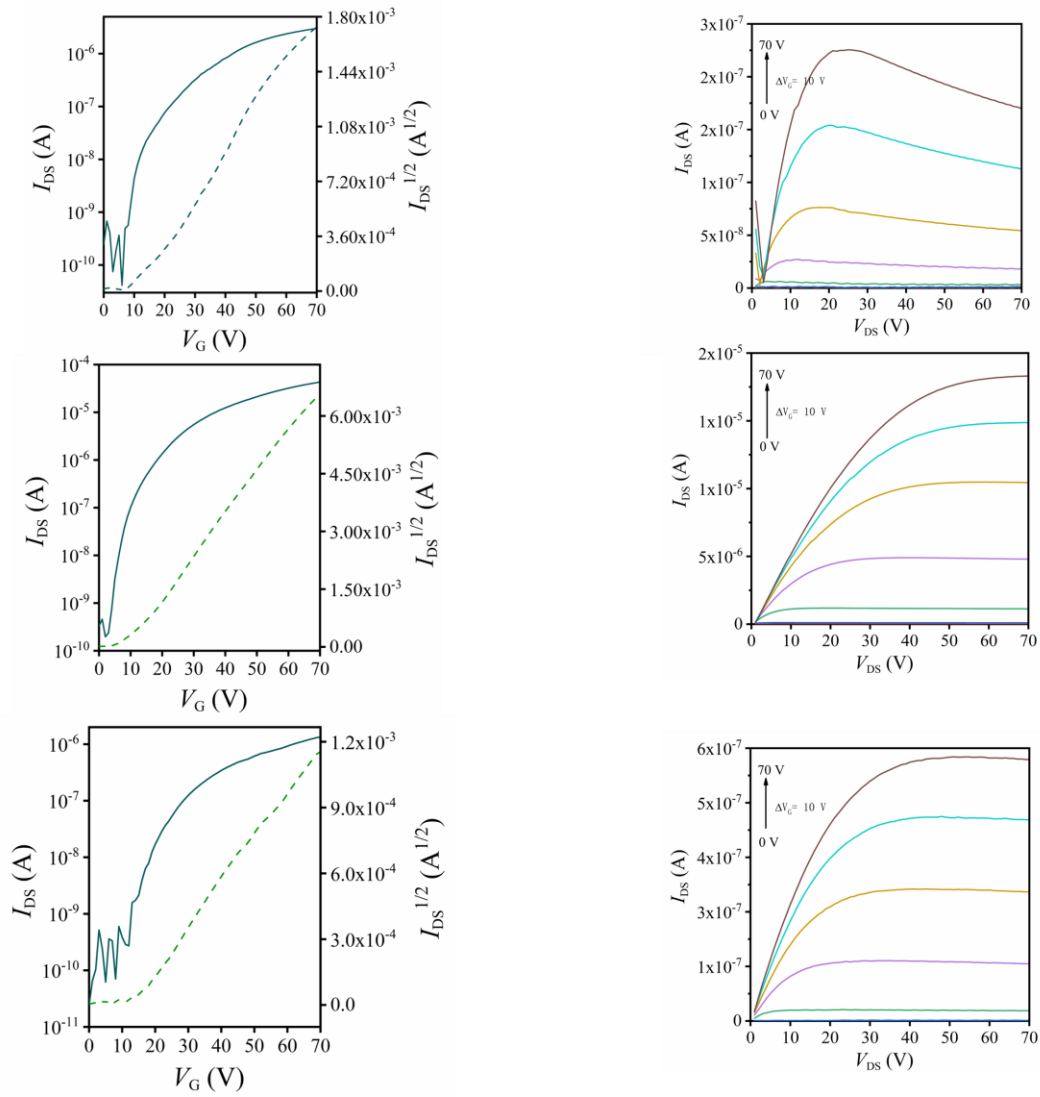

**Fig. S5.** Typical transfer and output characteristics of **MBI-PDI2** based devices. Transfer and output curves ( $V_{DS} = 70$  V) of **MBI-PDI2** OFET devices annealed at room temperature, 180 °C, 260 °C for 10 min.

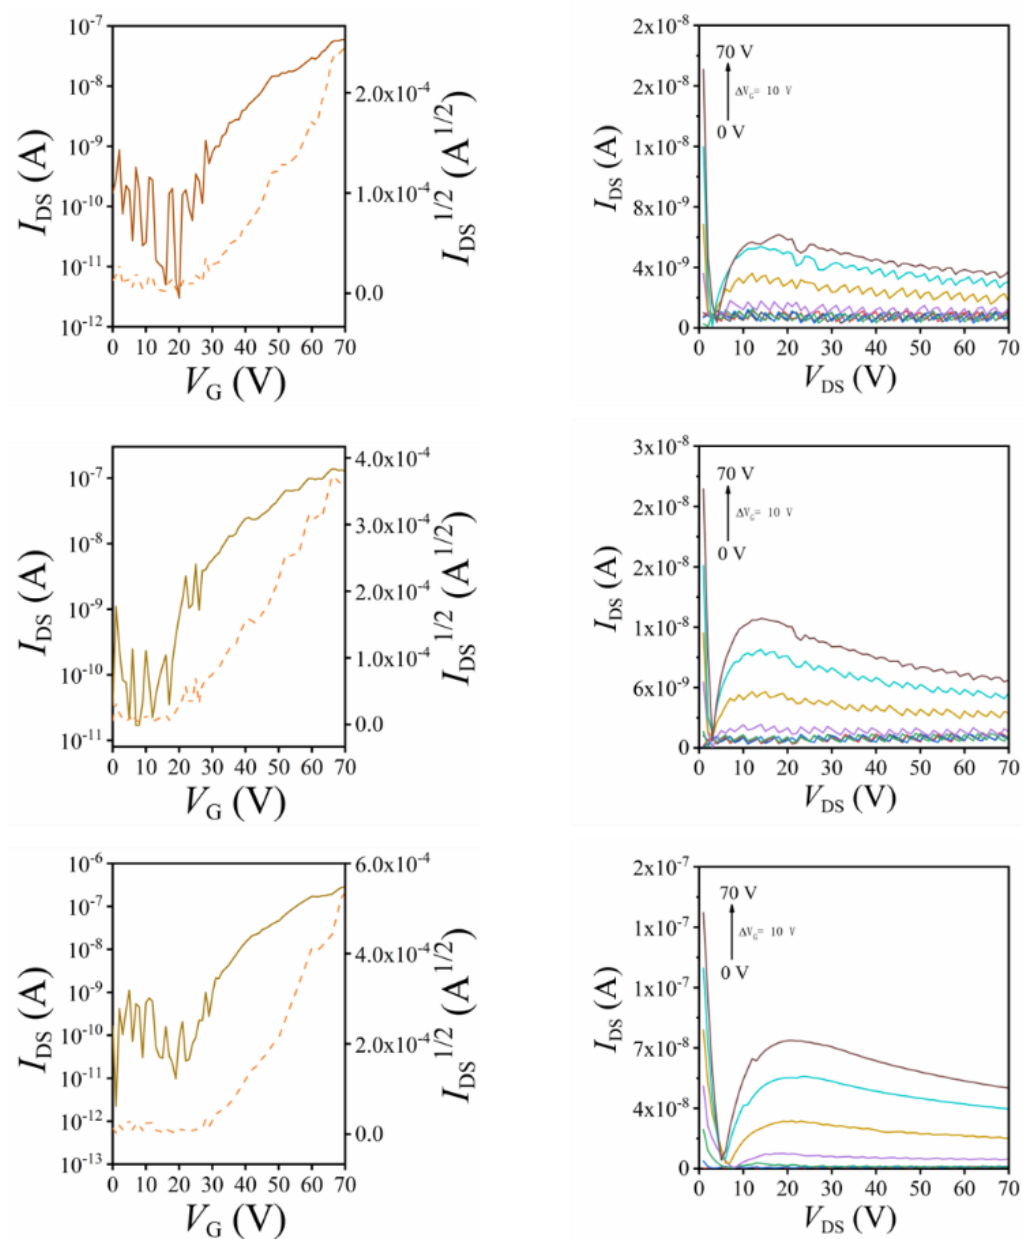

**Fig. S6.** Typical transfer and output characteristics of PDI2 based devices. Transfer and output curves ( $V_{DS} = 70$  V) of PDI2 OFET devices annealed at 80 °C, 120 °C and 140 °C for 10 min.

**Table S1.** The thin-film transistor properties of **FMBI-PDI2**, **MBI-PDI2** and **PDI2** at different annealing temperatures.

| Compound         | Annealing temperature (°C) | $\mu_e^a$ (cm <sup>2</sup> V <sup>-1</sup> s <sup>-1</sup> ) | $I_{ON}/I_{OFF}$ | $V_{th}$ (V) |
|------------------|----------------------------|--------------------------------------------------------------|------------------|--------------|
| <b>FMBI-PDI2</b> | As cast                    | 0.001<br>(0.002)                                             | 10 <sup>3</sup>  | 8 ± 5        |
|                  | 180                        | 0.023<br>(0.027)                                             | 10 <sup>5</sup>  | 11 ± 3       |
|                  | 220                        | 0.111<br>(0.131)                                             | 10 <sup>6</sup>  | 14 ± 5       |
|                  | 260                        | 0.081<br>(0.084)                                             | 10 <sup>5</sup>  | 19 ± 4       |
| <b>MBI-PDI2</b>  | As cast                    | 0.010<br>(0.012)                                             | 10 <sup>3</sup>  | 29 ± 3       |
|                  | 180                        | 0.025<br>(0.029)                                             | 10 <sup>5</sup>  | 28 ± 2       |
|                  | 220                        | 0.052<br>(0.053)                                             | 10 <sup>5</sup>  | 35 ± 2       |
|                  | 260                        | 0.011<br>(0.014)                                             | 10 <sup>4</sup>  | 27 ± 2       |
| <b>PDI2</b>      | As cast                    | --                                                           | --               | --           |
|                  | 80                         | 7.8 × 10 <sup>-5</sup><br>(8.0 × 10 <sup>-5</sup> )          | 10 <sup>3</sup>  | 31 ± 2       |
|                  | 120                        | 9.0 × 10 <sup>-5</sup><br>(1.2 × 10 <sup>-4</sup> )          | 10 <sup>6</sup>  | 22 ± 4       |
|                  | 140                        | 7.2 × 10 <sup>-4</sup><br>(7.3 × 10 <sup>-4</sup> )          | 10 <sup>4</sup>  | 32 ± 3       |

<sup>a</sup> Average mobilities, with the maximum mobilities shown in parentheses. More than 10 devices were characterized at different annealing temperature of **FMBI-PDI2**, **MBI-PDI2** and **PDI2**. All devices were measured under vacuum condition.



**Table S2.** Summary of electronic mobility of OFET with different aromatic compounds.

| <b>Compound</b>  | <b>Deposition Process</b> | <b><math>\mu_e</math> (cm<sup>2</sup> V<sup>-1</sup> s<sup>-1</sup>)</b> | <b>Ref</b> |
|------------------|---------------------------|--------------------------------------------------------------------------|------------|
| Dimer 2          | spin coating              | 0.02                                                                     |            |
| Trimer 3         | spin coating              | 0.04                                                                     | [33]       |
| Tetramer 4       | spin coating              | 0.05                                                                     |            |
| P1               | spin coating              | 0.01                                                                     | [65]       |
| P1               | spin coating              | 0.075                                                                    | [66]       |
| 5a               | spin coating              | 1.5                                                                      | [67]       |
| trans-cDBDB      | spin coating              | $9.9 \times 10^{-4}$                                                     | [68]       |
| <b>FMBI-PDI2</b> | spin coating              | 0.13                                                                     | This work  |
| <b>MBI-PDI2</b>  | spin coating              | 0.05                                                                     | This work  |

## 6. Microscopic morphology characterizations (AFM)

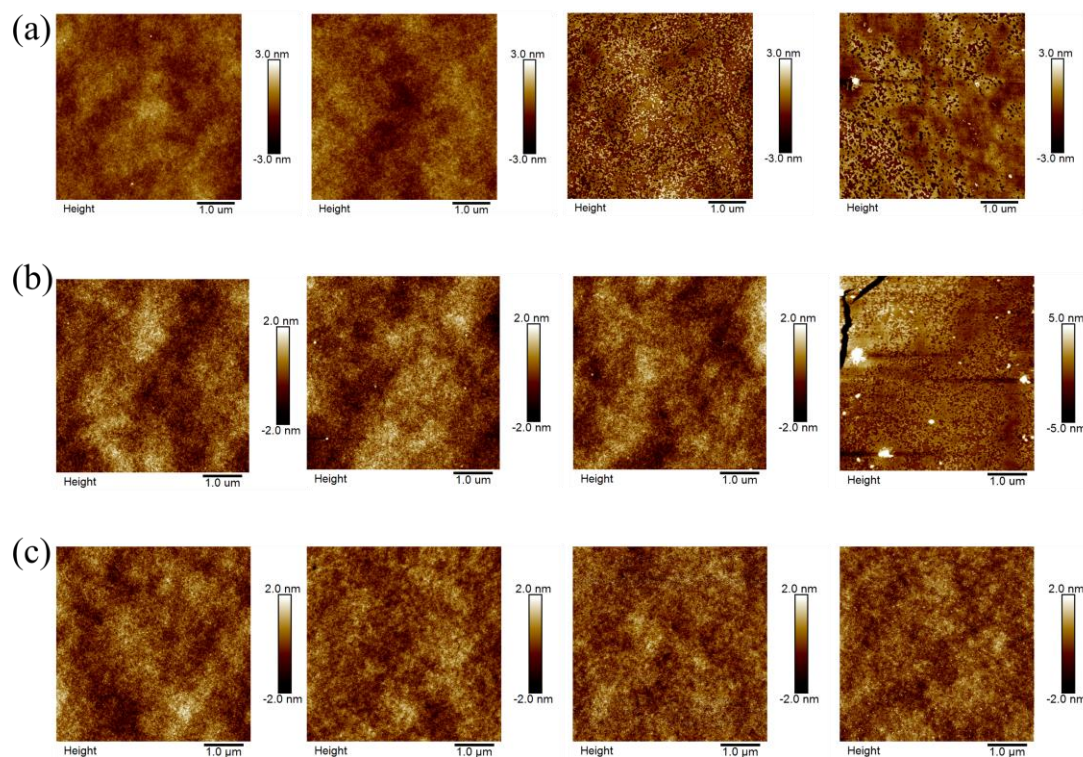

**Fig. S7.** AFM images of thin-films based on (a) **FMBI-PDI2**, (b) **MBI-PDI2** both at room temperature, 180, 220, 260 °C annealing temperatures and (c) **PDI2** at room temperature, 80, 120, 140 °C annealing temperatures.

## 7. $^1\text{H}$ and $^{13}\text{C}$ NMR spectra

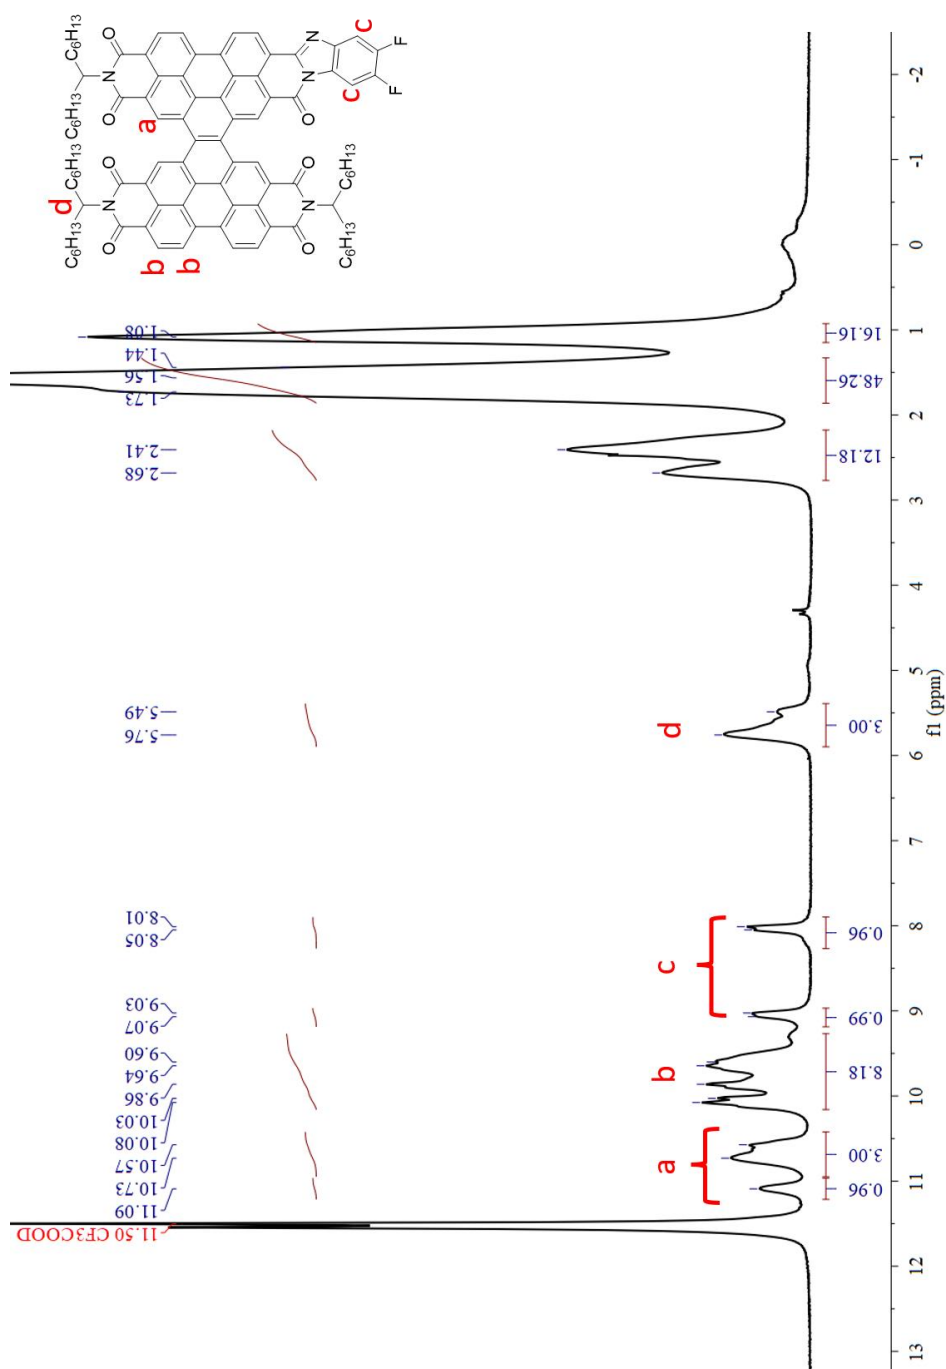

**Fig. S8.**  $^1\text{H}$  NMR spectra of FMBI-PDI2.

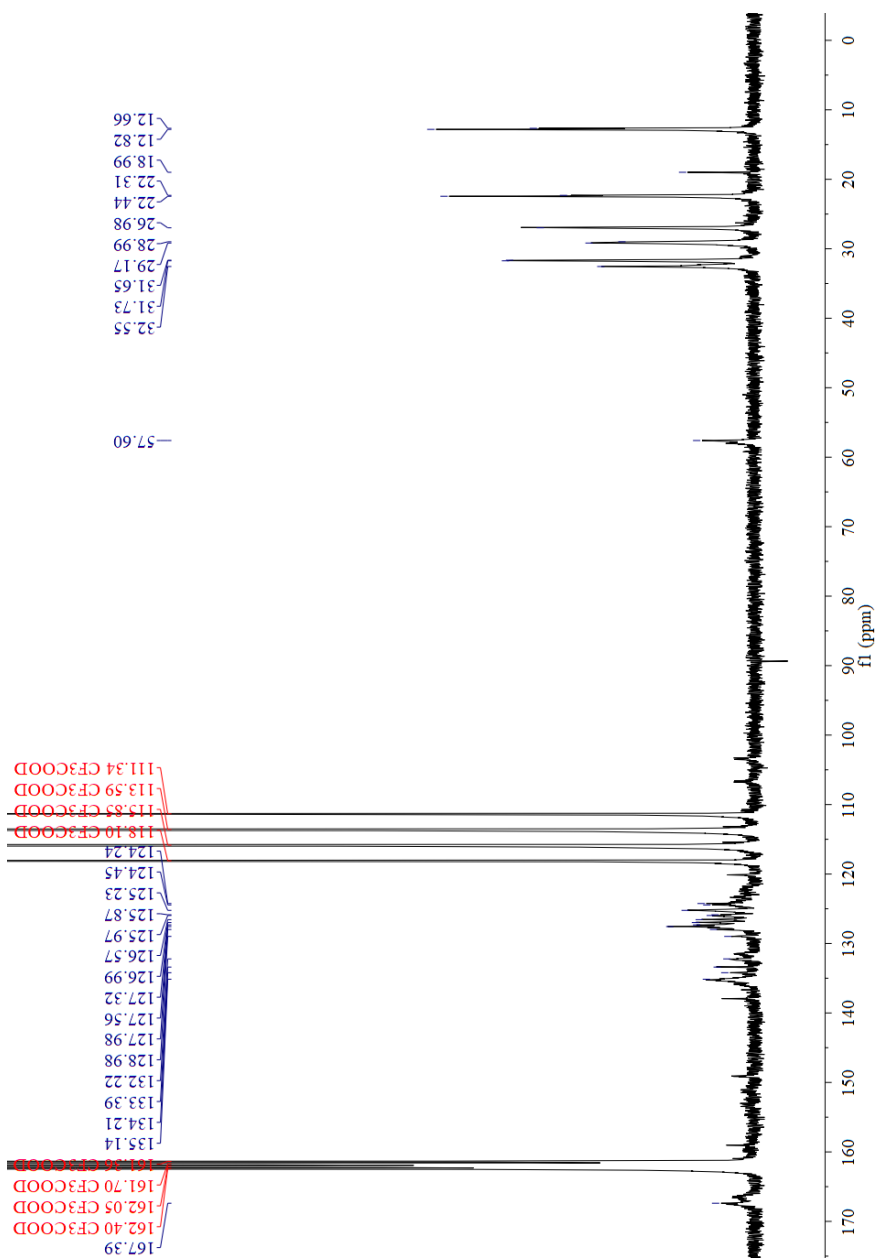

**Fig. S9.**  $^{13}\text{C}$  NMR spectra of FMBI-PDI2.

## 8. MALDI-TOF Mass spectrum

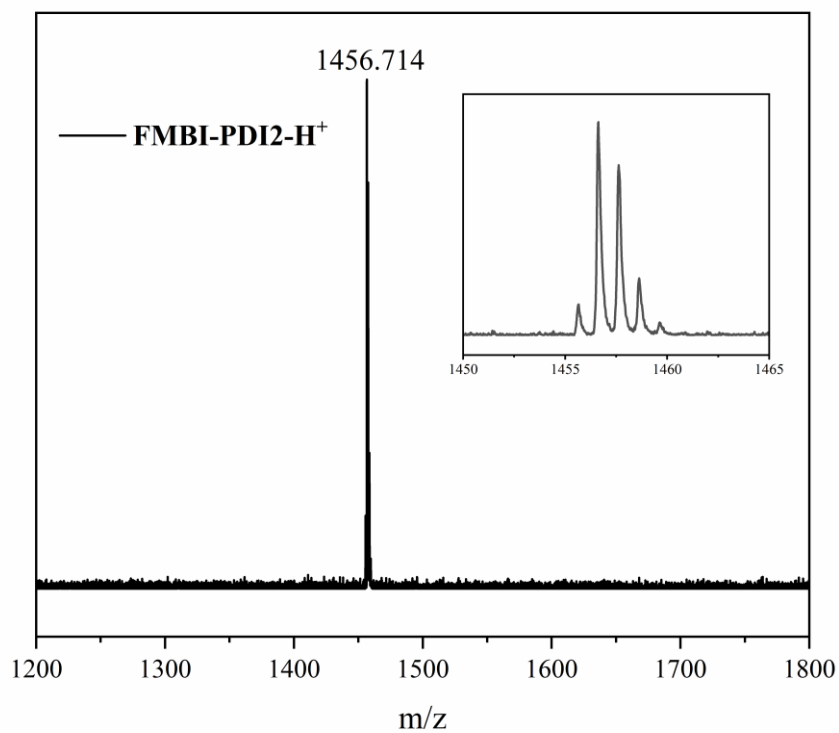

**Fig. S10.** MALDI-TOF mass spectroscopy of **FMBI-PDI2** with **DCTB** matrix in cationic mode

## 9. Optimized geometry

All calculations were performed using density functional theory (DFT) with the B3LYP functional and with the 6-31G(d) basis set in the Gaussian 09 program. The energies levels of the frontier orbitals were calculated at the optimized structure.

**Table S3.** Standard orientation of **FMBI-PDI2**

| Center<br>Number | Atomic<br>Number | Atomic<br>Type | Coordinates (Angstroms) |           |           |
|------------------|------------------|----------------|-------------------------|-----------|-----------|
|                  |                  |                | X                       | Y         | Z         |
| 1                | 8                | 0              | 4.521863                | -6.646587 | 0.268893  |
| 2                | 8                | 0              | 5.282939                | -2.417075 | -1.195043 |
| 3                | 6                | 0              | 6.575957                | -5.878412 | -1.819607 |
| 4                | 6                | 0              | 7.156663                | -5.291616 | 0.609858  |
| 5                | 6                | 0              | 6.391605                | -4.878867 | -0.663006 |
| 6                | 7                | 0              | -6.041279               | -4.049621 | 0.287206  |
| 7                | 8                | 0              | -4.892157               | -0.088505 | -0.838493 |
| 8                | 6                | 0              | 4.127478                | -5.517458 | 0.073267  |
| 9                | 7                | 0              | 4.970679                | -4.530857 | -0.415233 |
| 10               | 6                | 0              | 4.540525                | -3.240124 | -0.699315 |
| 11               | 6                | 0              | -4.536191               | -1.179765 | -0.435783 |
| 12               | 7                | 0              | -5.389490               | -2.103096 | -0.236513 |
| 13               | 6                | 0              | -5.052787               | -3.268502 | 0.157606  |
| 14               | 6                | 0              | -3.770829               | -3.596164 | 0.384221  |
| 15               | 6                | 0              | -3.392713               | -4.824122 | 0.760667  |
| 16               | 6                | 0              | -2.089062               | -5.110118 | 0.873248  |
| 17               | 6                | 0              | -2.266925               | -0.495679 | -0.331288 |
| 18               | 6                | 0              | -3.213700               | -1.435251 | -0.186825 |
| 19               | 6                | 0              | -2.826012               | -2.656811 | 0.214266  |
| 20               | 6                | 0              | -1.514554               | -2.935409 | 0.365671  |
| 21               | 6                | 0              | -1.121967               | -4.197467 | 0.643004  |
| 22               | 6                | 0              | 0.196641                | -4.501569 | 0.619226  |

|    |   |   |           |           |           |
|----|---|---|-----------|-----------|-----------|
| 23 | 6 | 0 | 0.654437  | -5.749132 | 0.838132  |
| 24 | 6 | 0 | 1.943308  | -6.072931 | 0.687319  |
| 25 | 6 | 0 | 2.832433  | -5.151940 | 0.285525  |
| 26 | 6 | 0 | 1.108298  | -3.552771 | 0.307330  |
| 27 | 6 | 0 | 2.404963  | -3.889124 | 0.102647  |
| 28 | 6 | 0 | 3.251071  | -2.952218 | -0.356765 |
| 29 | 6 | 0 | 2.799373  | -1.693646 | -0.474493 |
| 30 | 6 | 0 | -0.973116 | -0.674499 | 0.004531  |
| 31 | 6 | 0 | -0.600590 | -1.954749 | 0.213515  |
| 32 | 6 | 0 | 0.706011  | -2.268690 | 0.181822  |
| 33 | 6 | 0 | 1.586687  | -1.279285 | -0.062566 |
| 34 | 6 | 0 | -0.074208 | 0.344037  | 0.056527  |
| 35 | 6 | 0 | 1.239252  | 0.031905  | 0.020803  |
| 36 | 8 | 0 | -4.084721 | 2.822665  | 1.324959  |
| 37 | 8 | 0 | -3.315891 | 7.044608  | -0.154249 |
| 38 | 8 | 0 | 6.003249  | 0.410718  | 1.028592  |
| 39 | 8 | 0 | 7.148802  | 4.528708  | -0.492237 |
| 40 | 6 | 0 | -5.961038 | 5.722103  | -0.470218 |
| 41 | 6 | 0 | -5.355090 | 6.271910  | 1.961249  |
| 42 | 6 | 0 | 8.492853  | 0.831631  | -0.485558 |
| 43 | 6 | 0 | 8.509926  | 1.981533  | 1.806685  |
| 44 | 6 | 0 | 8.064766  | 2.065090  | 0.335769  |
| 45 | 6 | 0 | -5.188693 | 5.285916  | 0.790645  |
| 46 | 6 | 0 | 5.681222  | 1.471580  | 0.537259  |
| 47 | 7 | 0 | 6.631881  | 2.418736  | 0.187748  |
| 48 | 6 | 0 | 6.301828  | 3.690326  | -0.264372 |
| 49 | 6 | 0 | 2.137453  | 1.049926  | 0.071145  |
| 50 | 6 | 0 | 3.424555  | 0.872139  | 0.422270  |
| 51 | 6 | 0 | 4.385401  | 1.794525  | 0.260635  |
| 52 | 6 | 0 | 4.030213  | 3.012446  | -0.179250 |
| 53 | 6 | 0 | 4.971034  | 3.947445  | -0.406534 |
| 54 | 6 | 0 | 4.568440  | 5.170284  | -0.784263 |
| 55 | 6 | 0 | 3.265145  | 5.459052  | -0.869184 |

|    |   |   |            |           |           |
|----|---|---|------------|-----------|-----------|
| 56 | 6 | 0 | 1.781280   | 2.330916  | -0.146837 |
| 57 | 6 | 0 | 2.712025   | 3.295065  | -0.315441 |
| 58 | 6 | 0 | 2.305870   | 4.550848  | -0.604850 |
| 59 | 6 | 0 | -1.618666  | 2.078197  | 0.563257  |
| 60 | 6 | 0 | -0.411410  | 1.657867  | 0.141795  |
| 61 | 6 | 0 | 0.473975   | 2.642762  | -0.108805 |
| 62 | 6 | 0 | 0.075125   | 3.926986  | -0.235149 |
| 63 | 6 | 0 | 0.989974   | 4.866195  | -0.563300 |
| 64 | 6 | 0 | 0.535677   | 6.115676  | -0.780604 |
| 65 | 6 | 0 | -0.748433  | 6.449805  | -0.612241 |
| 66 | 7 | 0 | -3.772080  | 4.930258  | 0.529477  |
| 67 | 6 | 0 | -3.345258  | 3.638441  | 0.813481  |
| 68 | 6 | 0 | -2.062917  | 3.340281  | 0.453788  |
| 69 | 6 | 0 | -1.216939  | 4.271378  | -0.016608 |
| 70 | 6 | 0 | -1.638575  | 5.536605  | -0.195733 |
| 71 | 6 | 0 | -2.927859  | 5.911834  | 0.033327  |
| 72 | 6 | 0 | -6.660126  | -2.125239 | -0.360469 |
| 73 | 6 | 0 | -7.053022  | -3.363944 | -0.025001 |
| 74 | 6 | 0 | -7.595245  | -1.233706 | -0.727664 |
| 75 | 6 | 0 | -8.892161  | -1.592814 | -0.753149 |
| 76 | 6 | 0 | -9.265588  | -2.843246 | -0.412908 |
| 77 | 6 | 0 | -8.337084  | -3.741029 | -0.044262 |
| 78 | 9 | 0 | -9.807265  | -0.705079 | -1.117559 |
| 79 | 9 | 0 | -10.542447 | -3.197376 | -0.438581 |
| 80 | 1 | 0 | 7.652855   | -5.996796 | -2.080583 |
| 81 | 1 | 0 | 6.194941   | -6.895031 | -1.583604 |
| 82 | 1 | 0 | 6.046207   | -5.523526 | -2.733464 |
| 83 | 1 | 0 | 7.003198   | -4.542759 | 1.420967  |
| 84 | 1 | 0 | 6.857212   | -6.284767 | 1.006428  |
| 85 | 1 | 0 | 8.252574   | -5.354894 | 0.416521  |
| 86 | 1 | 0 | 6.964581   | -3.979296 | -1.000610 |
| 87 | 1 | 0 | -4.132072  | -5.626315 | 0.925548  |
| 88 | 1 | 0 | -1.889303  | -6.161440 | 1.124507  |



|     |   |   |           |           |           |
|-----|---|---|-----------|-----------|-----------|
| 89  | 1 | 0 | -2.580924 | 0.464414  | -0.762715 |
| 90  | 1 | 0 | 0.011758  | -6.595644 | 1.118420  |
| 91  | 1 | 0 | 2.219312  | -7.126221 | 0.864130  |
| 92  | 1 | 0 | 3.465000  | -0.959711 | -0.948514 |
| 93  | 1 | 0 | -5.812363 | 4.988598  | -1.295976 |
| 94  | 1 | 0 | -7.055776 | 5.781733  | -0.269293 |
| 95  | 1 | 0 | -5.665426 | 6.722999  | -0.849845 |
| 96  | 1 | 0 | -6.429342 | 6.402054  | 2.227385  |
| 97  | 1 | 0 | -4.827484 | 5.897152  | 2.868428  |
| 98  | 1 | 0 | -4.958985 | 7.285410  | 1.736730  |
| 99  | 1 | 0 | 8.131697  | 0.913410  | -1.536702 |
| 100 | 1 | 0 | 9.603049  | 0.739085  | -0.520340 |
| 101 | 1 | 0 | 8.122501  | -0.131528 | -0.074998 |
| 102 | 1 | 0 | 9.613745  | 1.851349  | 1.885765  |
| 103 | 1 | 0 | 8.241390  | 2.915354  | 2.352099  |
| 104 | 1 | 0 | 8.047575  | 1.130149  | 2.351115  |
| 105 | 1 | 0 | 8.710925  | 2.867360  | -0.100959 |
| 106 | 1 | 0 | -5.766211 | 4.385452  | 1.117909  |
| 107 | 1 | 0 | 3.713679  | -0.085436 | 0.876385  |
| 108 | 1 | 0 | 5.277733  | 5.988418  | -0.995677 |
| 109 | 1 | 0 | 3.061231  | 6.505376  | -1.136912 |
| 110 | 1 | 0 | -2.283793 | 1.346747  | 1.041653  |
| 111 | 1 | 0 | 1.176797  | 6.959521  | -1.071675 |
| 112 | 1 | 0 | -1.019601 | 7.504531  | -0.788112 |
| 113 | 1 | 0 | -7.349639 | -0.201384 | -1.014067 |
| 114 | 1 | 0 | -8.624522 | -4.766888 | 0.236492  |

-----  
Rotational constants (GHZ):      0.0319547      0.0196837      0.0124691

nuclear repulsion energy    12760.6886065306 Hartrees.
